# Supplementary material for: Contact Characteristics and Tribological Properties of the Weaving Surface of Mn-Cu and Fe-Zn Damping Alloys
Source: MDPI journal article supplement (doi:10.3390/ma15093303), 2022-05-05
Supplement: s1 [file s1]

Article

# Contact Characteristics and Tribological Properties of the Weaving Surface of Mn-Cu and Fe-Zn Damping Alloys

Lin Zhang <sup>1,\*</sup>, Xindong Yan <sup>1</sup>, Ying Shu <sup>1</sup>, Hongjuan Yang <sup>1</sup>, Xiaomin Kang <sup>2</sup>, Zhenbing Cai <sup>3</sup> and Minhao Zhu <sup>3</sup>

<sup>1</sup> School of Mechanical and Electrical Engineering, Chengdu University of Technology, Chengdu 610059, China; hpuxindong@163.com (X.Y.); shuying20000105@163.com (Y.S.); yhj1116@126.com (H.Y.)

<sup>2</sup> School of Mechanical Engineering, University of South China, Hengyang 421001, China; kxmswjtu@163.com

<sup>3</sup> Institute of Tribology, Southwest Jiaotong University, Chengdu 610031, China; czb\_jiaoda@126.com (Z.C.); zhuminhao@139.com (M.Z.)

\* Correspondence: zllz19891@163.com

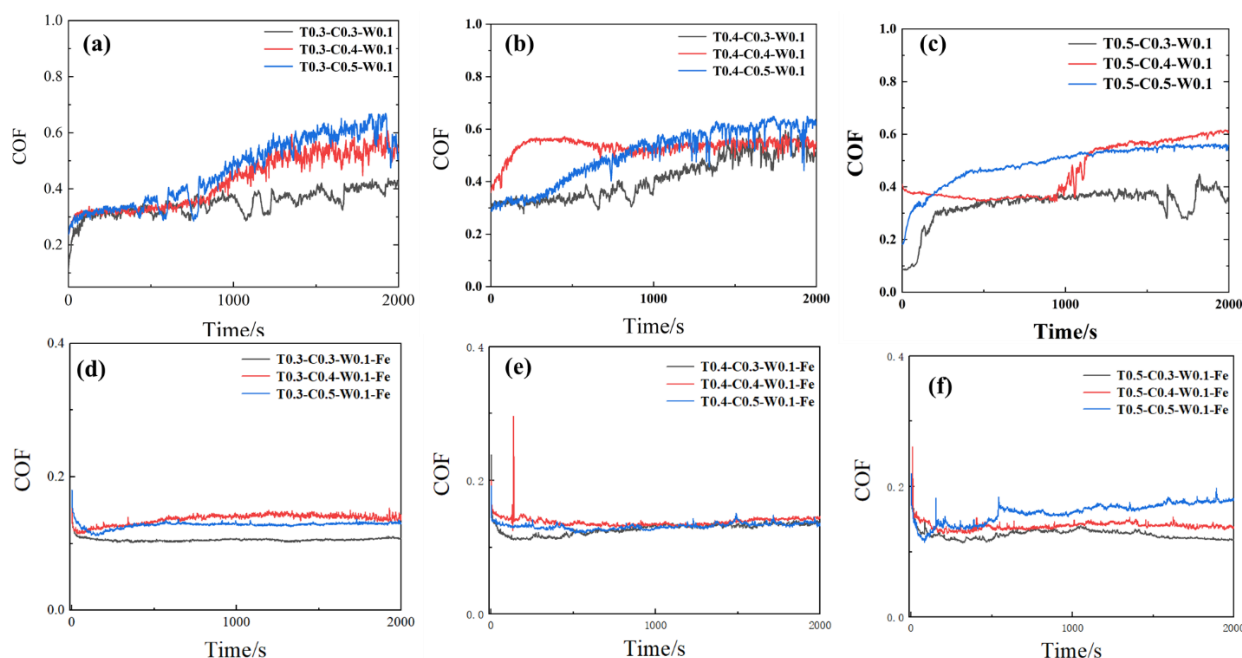

**Figure S1.** Friction coefficients of samples with different weaving parameters (a) Coefficient of Mn-Cu samples(T0.3-W0.1); (b) Coefficient of Mn-Cu samples(T0.4-W0.1); (c) Coefficient of Mn-Cu samples(T0.5-W0.1); (d) Coefficient of Fe-Zn samples(T0.3-W0.1); (e) Coefficient of Fe-Zn samples(T0.4-W0.1); (f) Coefficient of Fe-Zn samples(T0.5-W0.1).

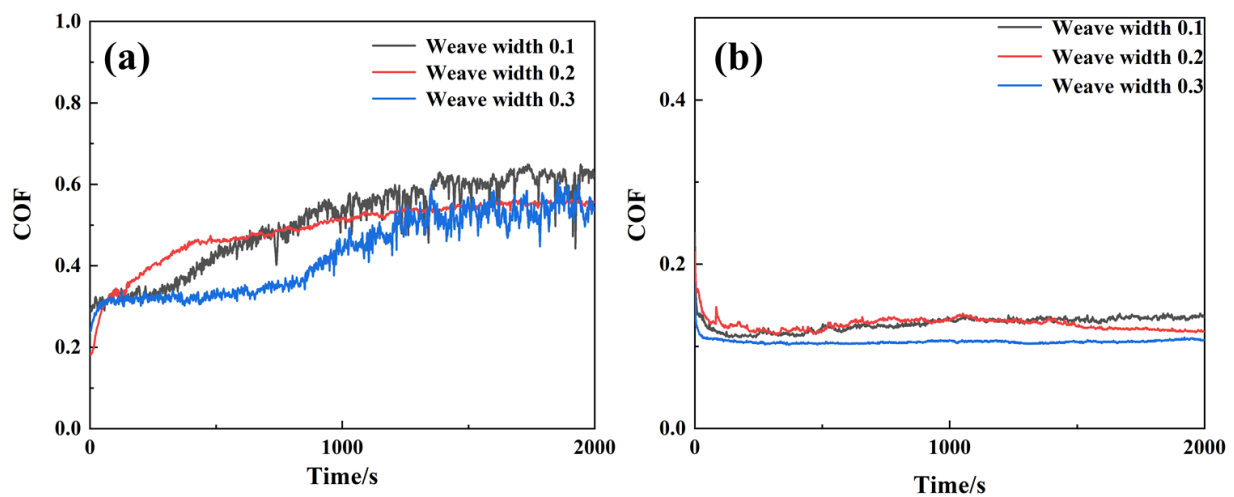

**Figure S2.** Friction coefficients of samples with different weaving width (a) Mn-Cu samples; (b) Fe-Zn samples.

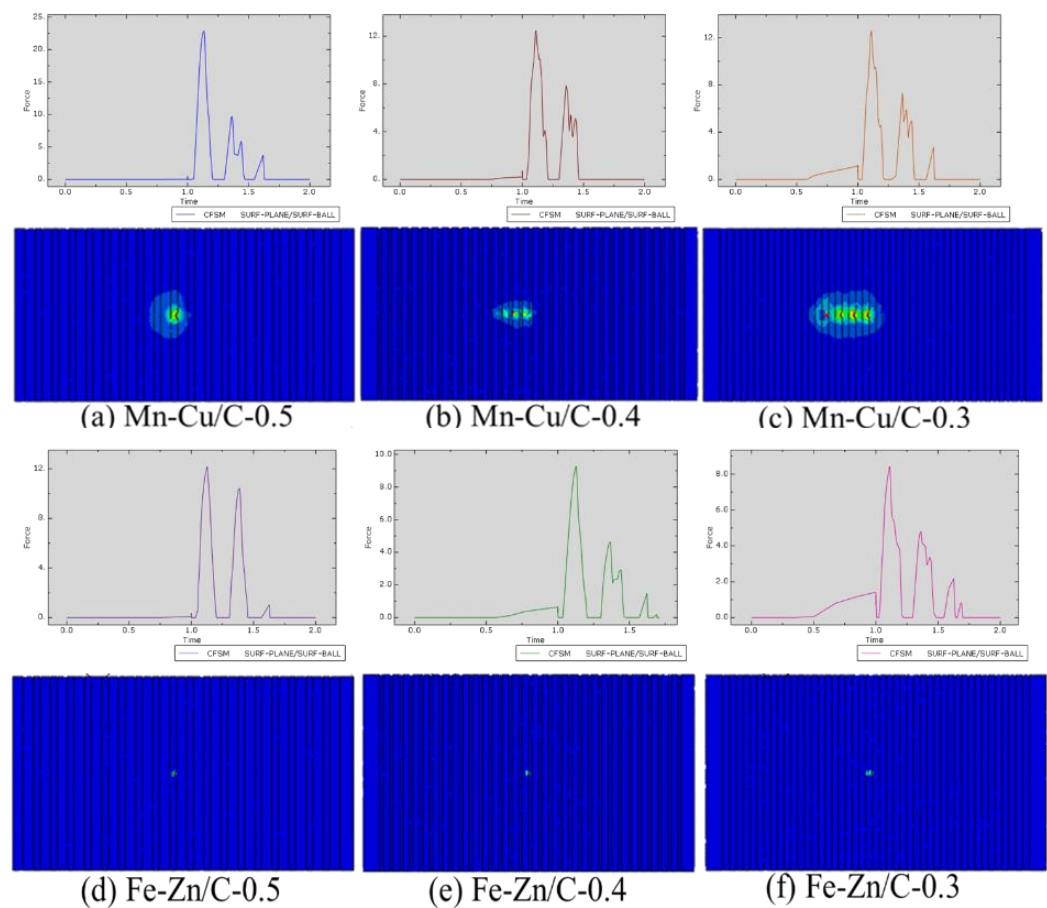

**Figure S3.** Friction process simulation of Mn-Cu samples with different weave center distance (a) C-0.5; (b) C-0.4; (c) C-0.3; and Fe-Zn samples with different weave center distance (d) C-0.5; (e) C-0.4; (f) C-0.3.

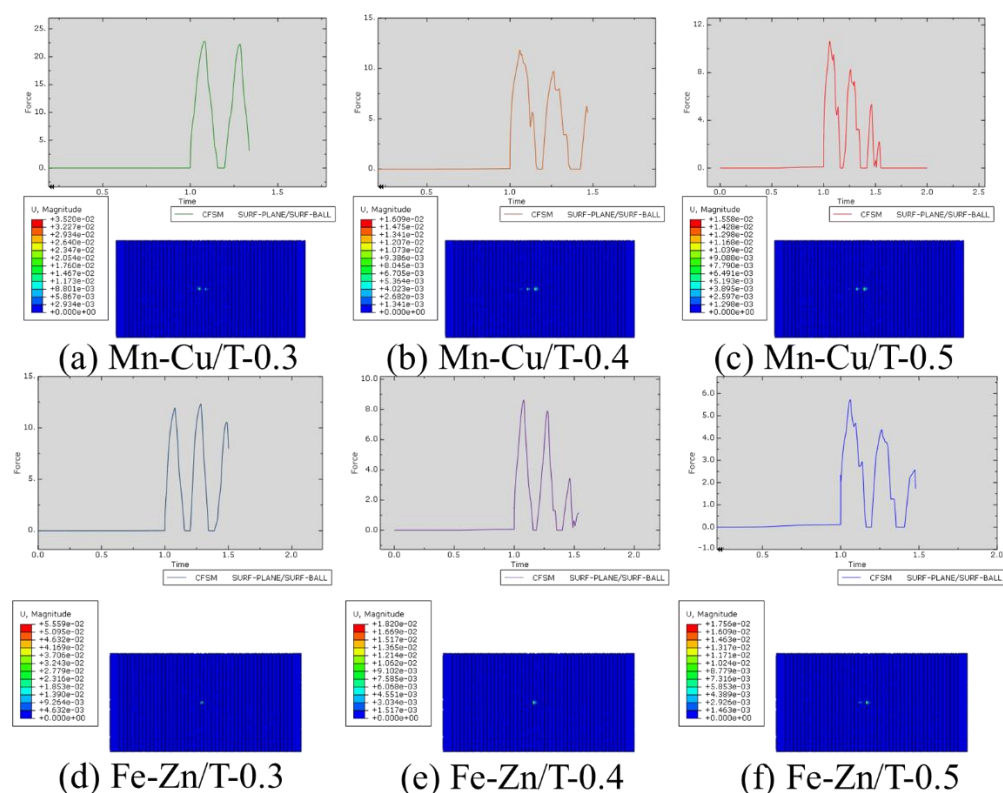

**Figure S4.** Friction process simulation of Mn-Cu samples with different thickness (a) T-0.5; (b) T-0.4; (c) T-0.3; and Fe-Zn samples with different thickness (d) T-0.5; (e) T-0.4; (f) T-0.3.

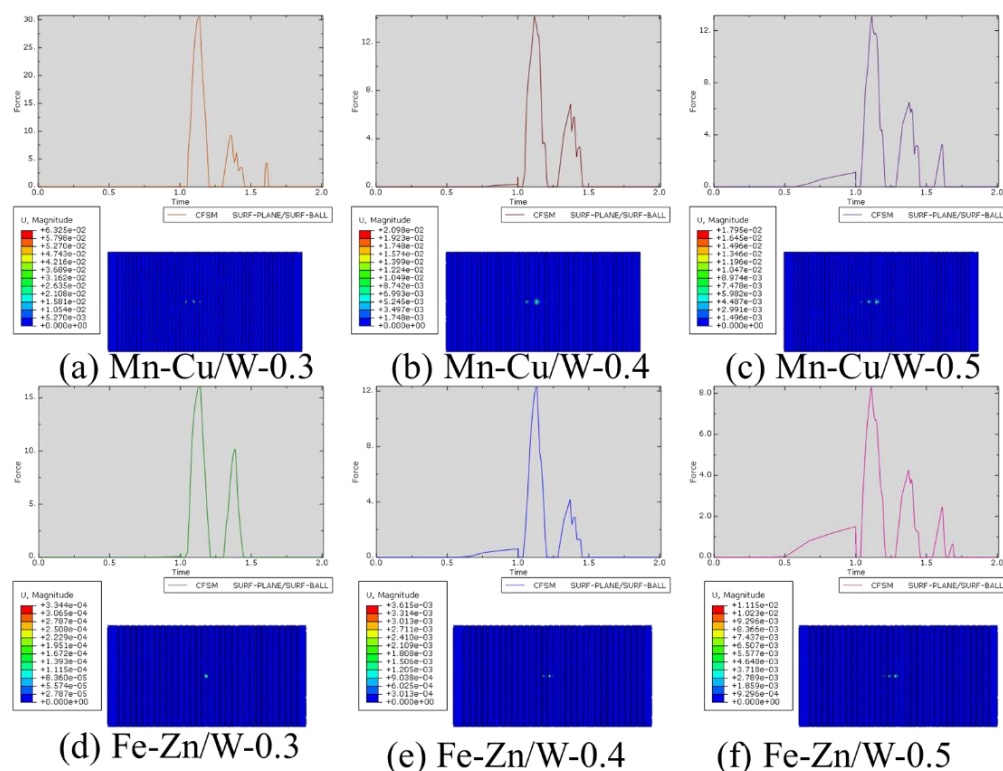

**Figure S5.** Friction process simulation of Mn-Cu samples with different weave width (a) W-0.5; (b) W-0.4; (c) W-0.3; and Fe-Zn samples with different weave width (d) W-0.5; (e) W-0.4; (f) W-0.3.
